# Supplementary material for: Visible light-driven novel nanocomposite (BiVO4/CuCr2O4) for efficient degradation of organic dye
Source: Royal Society of Chemistry journal article supplement (doi:10.1039/c2dt32753h), 2013-01-01
Supplement: c2dt32753h.pdf [file c2dt32753h.pdf]

## SUPPORTING INFORMATION

Visible light driven novel semiconductor nanocomposite ( $\text{BiVO}_4/\text{CuCr}_2\text{O}_4$ ), for efficient degradation of organic dyes.

*R. Bajaj, Madhulika Sharma, and D. Bahadur*

Department of Metallurgical Engineering and Materials Science, Indian Institute of Technology, Bombay, Powai, Mumbai 400076, INDIA

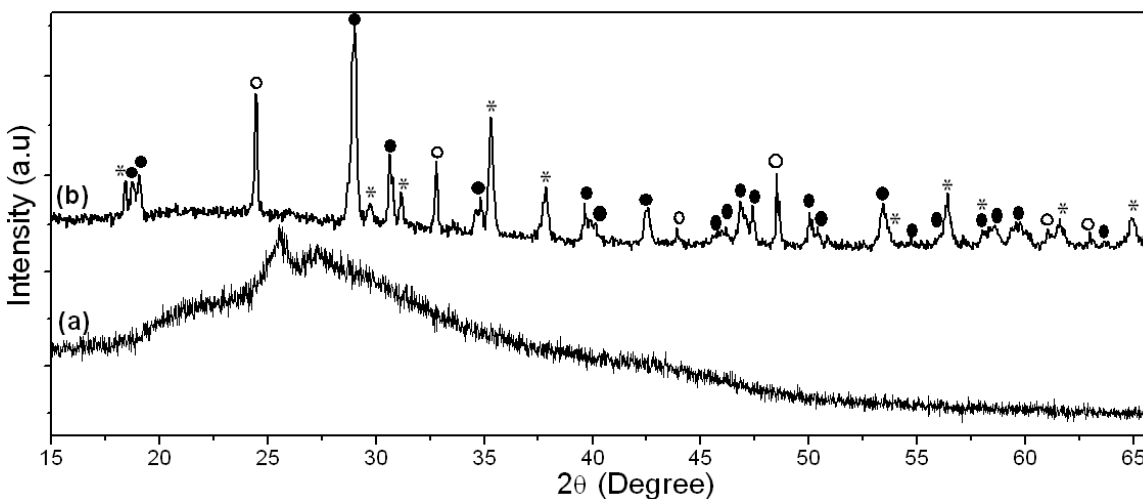

**Fig. S1** XRD pattern of (a) polyaniline and (b) hybrid nanomaterial. Filled and hollow circles correspond to the monoclinic and tetragonal phase of  $\text{BiVO}_4$  respectively, while star represents tetragonal phase of  $\text{CuCr}_2\text{O}_4$  in the composite nanomaterial.

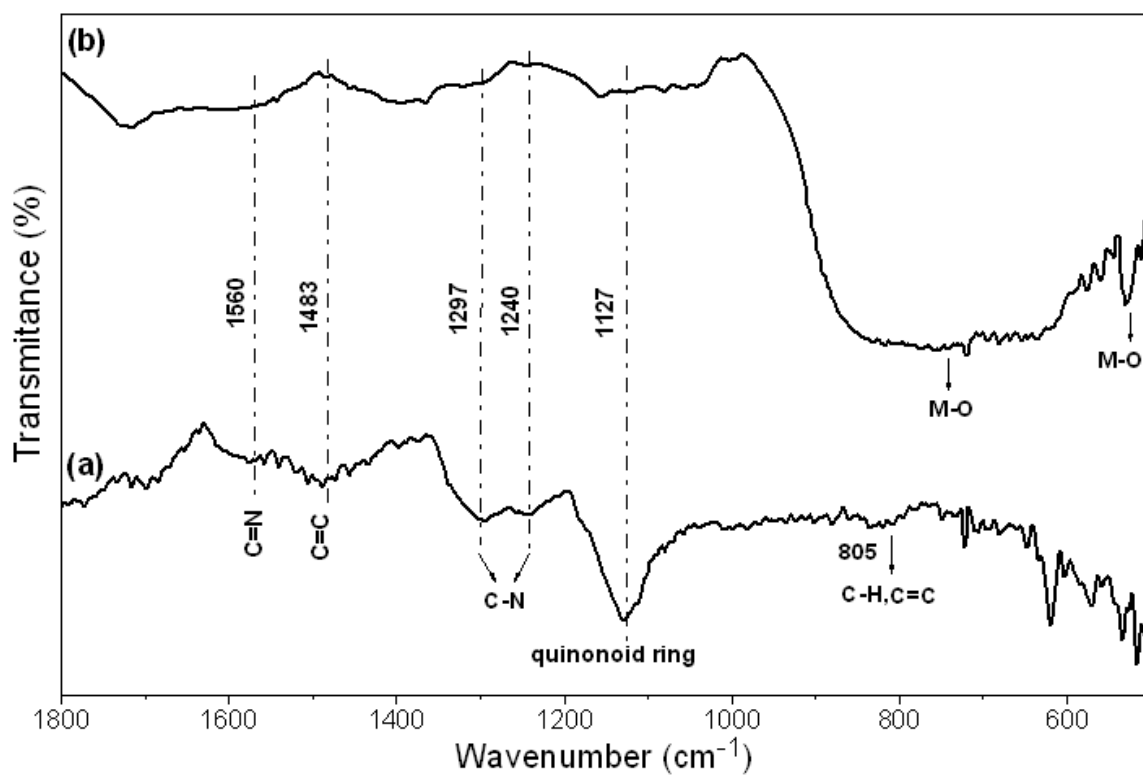

**Fig. S2** FTIR spectra of (a) PANI and (b)  $\text{BiVO}_4/\text{CuCr}_2\text{O}_4/\text{PANI}$  hybrid respectively.

**Table S1** Concentration (ppm) of dye at different intervals of time corresponding to different composition (mass ratio of  $\text{BiVO}_4$  and  $\text{CuCr}_2\text{O}_4$ ) of photocatalyst

| time(min.) | $\text{BiVO}_4 : \text{CuCr}_2\text{O}_4$ |        |          | $\text{BiVO}_4$ |
|------------|-------------------------------------------|--------|----------|-----------------|
|            | 1:1                                       | 1:0.25 | 1:0.0625 |                 |
| 0          | 10.0                                      | 10.0   | 10.0     | 10.0            |
| 30         | 8.20                                      | 6.80   | 7.23     | 8.84            |
| 60         | 6.53                                      | 4.66   | 5.26     | 7.77            |
| 90         | 5.32                                      | 3.20   | 3.81     | 6.89            |
| 120        | 4.33                                      | 2.12   | 2.74     | 6.03            |
| 150        | 3.50                                      | 1.48   | 1.63     | 5.32            |
| 180        | 2.81                                      | 0.996  | 1.47     | 4.68            |

**Table S2** Concentration of the dye (ppm) left at different intervals of time using hybrid and composite material as photocatalyst.

| <b>time(min.)</b> | <b>BiVO<sub>4</sub>:CuCr<sub>2</sub>O<sub>4</sub></b> | <b>(BiVO<sub>4</sub>:CuCr<sub>2</sub>O<sub>4</sub>)/PANI</b> |
|-------------------|-------------------------------------------------------|--------------------------------------------------------------|
| 0                 | 10.0                                                  | 10.0                                                         |
| 30                | 8.20                                                  | 6.00                                                         |
| 60                | 6.53                                                  | 3.61                                                         |
| 90                | 5.32                                                  | 2.22                                                         |
| 120               | 4.33                                                  | 1.33                                                         |
| 150               | 3.50                                                  | 0.80                                                         |
| 180               | 2.81                                                  | 0.48                                                         |
